# Supplementary material for: Deciphering the molecular specificity of phenolic compounds as inhibitors or glycosyl acceptors of β-fructofuranosidase from Xanthophyllomyces dendrorhous
Source: PubMed Central journal article supplement (PMC6877581; doi:10.1038/s41598-019-53948-y), 2019-11-25

**Deciphering the molecular specificity of phenolic compounds as inhibitors or glycosyl acceptors of  $\beta$ -fructofuranosidase from *Xanthophyllomyces dendrorhous***

M. Ramírez-Escudero<sup>a</sup>, N. Míguez<sup>b</sup>, M. Gimeno-Pérez<sup>c</sup>, A.O. Ballesteros<sup>b</sup>, M. Fernández-Lobato<sup>c</sup>, F. J. Plou<sup>b,\*</sup> and J. Sanz-Aparicio<sup>a,\*</sup>

<sup>a</sup> *Macromolecular Crystallography and Structural Biology Department, Institute of Physical-Chemistry Rocasolano (CSIC), Serrano 119, 28006 Madrid, Spain*

<sup>b</sup> *Institute of Catalysis and Petrochemistry (CSIC), Marie Curie 2, 28049 Madrid, Spain*

<sup>c</sup> *Centre of Molecular Biology Severo Ochoa (CSIC-UAM), Autonomous University of Madrid, 28049 Madrid, Spain*

**Figure S1.** Mass spectrometry ESI-QTOF analysis of HQ fructoside (4-hydroxyphenyl- $\beta$ -D-fructofuranoside).

Fig. S1

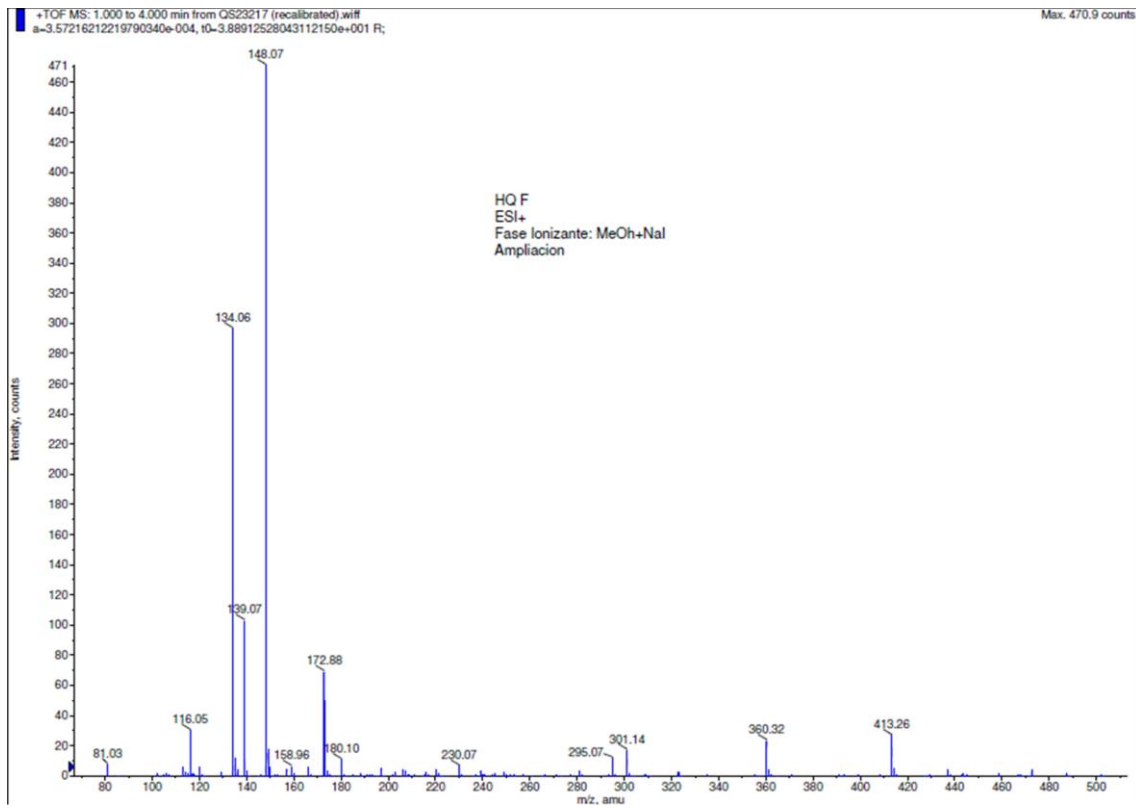

Supplement: 41598_2019_53948_MOESM1_ESM.pdf [file 41598_2019_53948_MOESM1_ESM.pdf]
